# Supplementary figures and images for: WRNIP1 prevents transcription-associated genomic instability
Source: eLife journal article supplement (doi:10.7554/elife.89981), 2023-08-31

Figure 1 – Source data 1

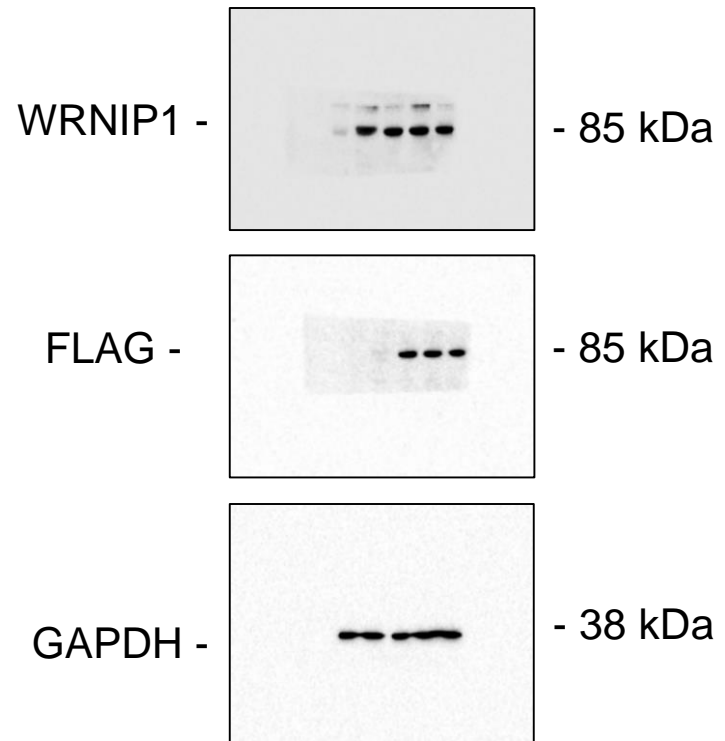

Supplement: fig1-data1 [file elife-89981-fig1-data1-v1.zip]

Figure 2 – Source data 1

IB: S9.6

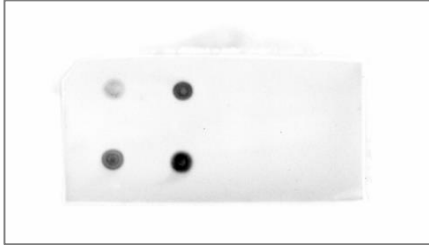

IB: dsDNA

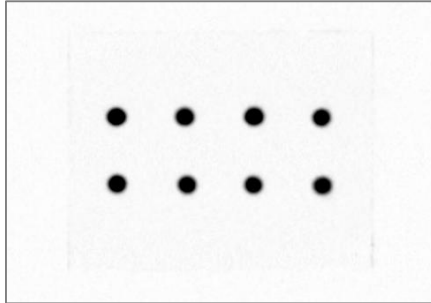

Supplement: fig2-data1 [file elife-89981-fig2-data1-v1.zip]

Figure 7 – Source data 1

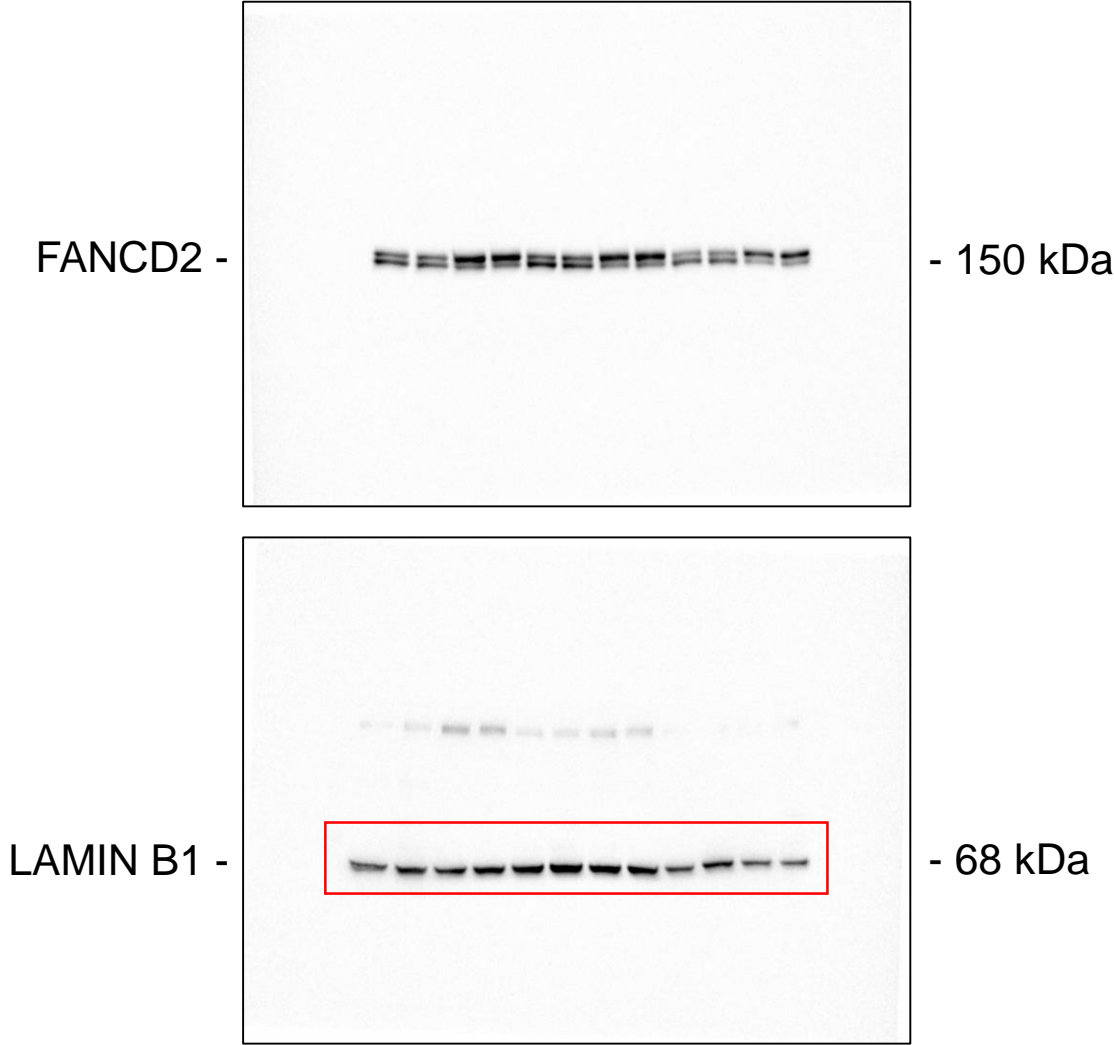

Supplement: fig7-data1 [file elife-89981-fig7-data1-v1.zip]

Figure 7 – Source data 2

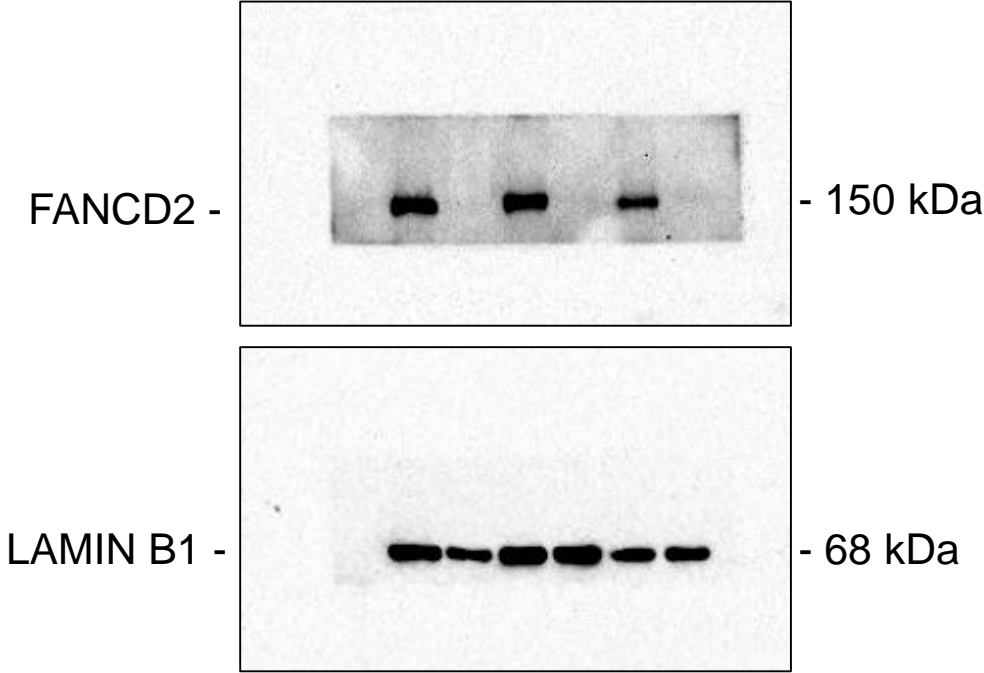

Supplement: fig7-data2 [file elife-89981-fig7-data2-v1.zip]

Figure 7 - figure supplement 2– Source data 1

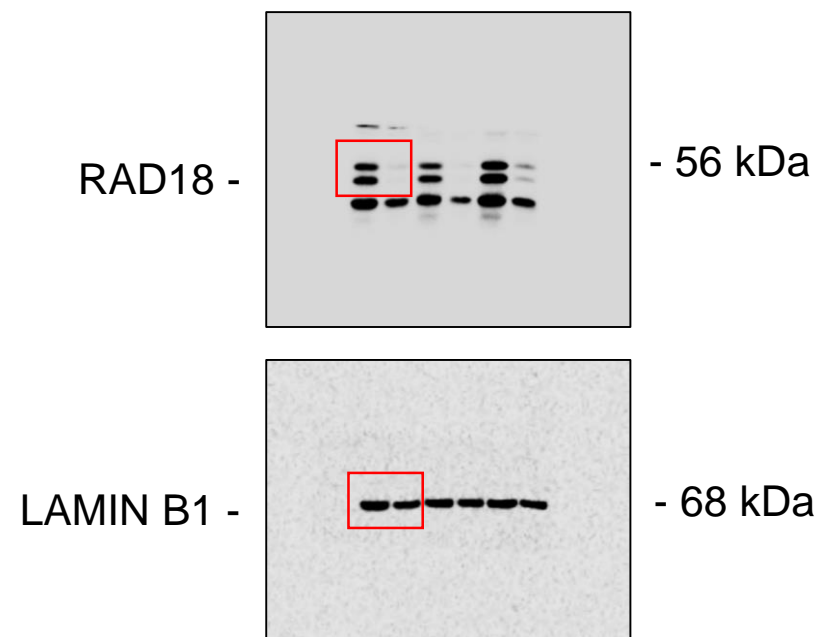

Supplement: fig7-figsupp2-data1 [file elife-89981-fig7-figsupp2-data1-v1.zip]
